# Supplementary material for: Structure–function relationship of dynorphin B variants using naturally occurring amino acid substitutions
Source: Front Pharmacol. 2024 Oct 30;15:1484730. doi: 10.3389/fphar.2024.1484730 (PMC11557314; doi:10.3389/fphar.2024.1484730)
Supplement: Supplementary file 1 [file Table1.XLSX]

## Sheet: DynA
Analysis data of Western blots. Samples were run in duplicates, highlighted in colour
DynA
untreated	untreated	treated	treated	untreated	untreated	treated	treated
pP38	Cofilin	pP38	Cofilin	P38	Cofilin	P38	Cofilin
17594347	45774731	2.48666e+07	50781953	35841489	12384024	33280832	14334468
9540811	29302024	42724882	46095125	37659368	9757246	35417125	13013882
28700660	51431560	2.57671e+07	68848045	43732317	14100681	33860267	50613903
20426468	37764660	42064296	45909125	45522953	14808489	54451660	21379125
3869154	56961016	21156439	58153024	45330539	50426853	32836196	42783196
3979983	68673731	1.29575e+07	59213317	52348146	55474560	37577660	36666368
6424075	38959338	16475125	54962267	39140439	44267388	41305368	52347317
7732811	48970782	1.44775e+07	52632660	36937418	36916832	37525125	39904660
3800690	35189953	20962539	47036731	34853125	48455368	45240903	68029439
4.09032e+06	50772903	2.51733e+07	61828610	36394832	38947439	52081024	56061560
5.3335e+06	35332874	1.91057e+07	38065610	30702752	26511924	27459489	25465146
4078296	44701782	21808418	40050196	36825953	41394782	29857246	33150953
4.00747e+06	31334874	19386368	31230610	34429702	25414903	29661489	25292903
4935418	47790196	18591903	44684489	29549125	35435903	25443711
AUD values obtained from Image J gel analyzer
DynA
untreated	untreated	treated	treated	untreated	untreated	treated	treated
pP70	Cofilin	pP70	Cofilin	P70	Cofilin	P70	Cofilin
14830326	45774731	18171276	50781953	21831539	12384024	25934832	14334468
5883497	29302024	23340569	46095125	20991660	9757246	19215589	13013882
3351205	51431560	27223246	68848045	42915903	14100681	31724853	50613903
3816568	37764660	17339861	45909125	42612782	14808489	49020418	21379125
	56961016	41401690	58153024	36761660	50426853	31671610	42783196
15256154	68673731	40141811	59213317	40278903	55474560	40313368	36666368
8121882	38959338	27637711	54962267	36315196	44267388	37040368	52347317
4859740	48970782	32177811	52632660	40537711	36916832	47002246	39904660
11665811	35189953	33138175	47036731	26156125	48455368	40076196	68029439
9939225	50772903	24504518	61828610	35518953	38947439	52063903	56061560
	56504945	9317489	46458610	25451681	26511924	32571075	25465146
3886468	50315075	10589953	45159368	22094832	41394782	31228953	33150953
AUD values obtained from Image J gel analyzer
DynA
untreated	untreated	treated	treated	untreated	untreated	treated	treated
pERK	Cofilin	pERK	Cofilin	ERK	Cofilin	ERK	Cofilin
560154	24134539	70171167	31954631	34936489	45065610	38096146	60465459
508569	49574903	34699924	39559217	43599317	37644853	57383660	53902317
421033	30670803	53113409	46749510	39957660	19953660	50257752	44040439
193577	39834681	49172610	59988832	32201296	29551539	54994418	30324418
719296	33334974	37623995	31215510	39956095	43586631	37503146	47257803
1060782	46725024	34527439	42404903	47291246	40841196	35126539	31452246
657933	13134803	44000681	14435974	25461267	49568146	33368782	31607024
1244468	33938075	39298146	52718439	32556296	21588296	38365196	28924317
1303518	23294832	41384560	39927146	23594418	22420539	47745368	23564317
898640	40900782	39283439	38109953	31039711	25534125	57333146	39413267
1097296	38511731	52349731	43113075	24795489	35201731	47333832	52898368
1247125	20216610	56712731	46810903	34014660	26371782	56106560	54632681
		60862167	47528146	24611095	37805388	48830196	39564368
5025125	48355560	52686095	48325196	35658539	45394660	47893489	47087610
		40721510	52582267	22310368	35113660	42618125	38149418
5278660	64194974	39542217	62825146	29536811	11159518	43244953	28722953
AUD values obtained from Image J gel analyzer

## Sheet: DynB
Analysis data of Western blots. Samples were run in duplicates, highlighted in colour
DynB
untreated	untreated	treated	treated	untreated	untreated	treated	treated
pP38	Cofilin	pP38	Cofilin	P38	Cofilin	P38	Cofilin
5712083	41396761	6518033	62473489	30582468	26189125	24484154	26157861
1662205	41164640	17080782	67312267	36317882	40177832	25957811	33402104
3450518	32027104	17588489	44847782	29200832	44346782	31688480	54289723
	33390690		38709326	28275681	24523510	26116882	45061175
589870	34823388	43522054	55433317	40276581	41818631	34366782	58108267
18678468	53896610	36632711	58103610	35783368	40350368	37387368	55355075
9253882	20987974	27516811	56735317	42907045	42453874	35892782	60506731
12731740	50760075	29705276	55448660	32758004	49628539	41496489	56842196
17190740	66937660	48506761	62826731	38787368	40540711	33656953	39514731
16737861	58489489	41035933	57253782	41386832	38938711	30525660	34149246
12638418	49961217	39910539	42037368	51124075	48869731	38756560	51835610
19854539	51355974	2.85585e+07	44033731	45834489	43815196	33153024	40753267
8976260	46370631	36288550	39671388	44627995	61486238	42890832	47322660
6596832	27067196	30565660	35839246	47022246	39303782	33169489	43920903
13774459	59387702	29507146	55809146	41252702	22993196	38094953	24490246
16883711	37918075	33402660	46800903	46974782	35142539	36962368	19535660
AUD values obtained from Image J gel analyzer
DynB
untreated	untreated	treated	treated	untreated	untreated	treated	treated
pP70	Cofilin	pP70	Cofilin	P70	Cofilin	P70	Cofilin
4516033	41396761	7854711	62473489	30782347	26189125	35562276	26157861
2342932	41164640	11565903	67312267	38807296	40177832	38489811	33402104
4106711	32027104	29876924	44847782	30171075	44346782	34368137	54289723
4289953	33390690	36973882	38709326	23362146	24523510	22627175	45061175
3214146	34823388	15932196	55433317	9846146	41818631	42443953	58108267
6580004	53896610	22657024	58103610	7544468	40350368	39339953	55355075
14355610	20987974	37785075	56735317	31085803	42453874	40022782	60506731
12687004	50760075	41664953	55448660	30950539	49628539	34418782	56842196
17788004	66937660	33175660	62826731	34162589	40540711	29043539	39514731
16364832	58489489	37446489	57253782	37445711	38938711	32848418	34149246
13408660	49961217	45940196	42037368	36302368	48869731	27410610	51835610
5806589	51355974	30915317	44033731	19805782	43815196	18340610	40753267
19827794	54113773	46737066	35334146	48363874	61486238	37541246	47322660
21298933	18867589	36027439	18122296	45496539	39303782	41987953	43920903
16806803	49366752	27114196	48722024	34748309	22993196	24490246	24490246
17622175	38979953	36643711	33768418	45597832	35142539	19535660	19535660
AUD values obtained from Image J gel analyzer
DynB
untreated	untreated	treated	treated	untreated	untreated	treated	treated
pERK	Cofilin	pERK	Cofilin	ERK	Cofilin	ERK	Cofilin
456911	27189246	60180773	28200359	18871246	22988317	34837489	28198317
634690	42079439	53690681	54310853	35880267	30615974	44633489	50575317
721347	29027702	46742660	47465782	23594418	22420539	47745368	23564317
1441761	31916711	59236731	28486610	31039711	25534125	57333146	39413267
	21835409	58864610	29209024	24795489	35201731	47333832	52898368
870861	43185640	59301903	49606782	34014660	26371782	56106560	54632681
6126468	47951832	52594853	43092246	40297004	34051832	37893439	28990560
4013761	38396711	60115731	28855903	37302640	30216761	37489660	48474489
8764075	55451660	45989832	58778468	44440196	29591246	37439660	34401782
11519953	49901903	53457681	51269075	51560439	51839853	43556418	42261246
9029388	43584874	48083388	39268560	44142974	36363095	49917610	55173146
10206296	29859489	59353803	43860974	45226125	35660489	40719368	39531903
17768823	36838167	50907803	26469903	54983752	31732681	51419317	43451974
16550246	31511953	47962388	25973368	41649782	48522903	50509317	45358853
AUD values obtained from Image J gel analyzer

## Sheet: DynB_G3A_Q8A
Analysis data of Western blots. Samples were run in duplicates, highlighted in colour
DynB_G3A/Q8A
untreated	untreated	treated	treated	untreated	untreated	treated	treated
pP38	Cofilin	pP38	Cofilin	P38	Cofilin	P38	Cofilin
11877853	32636196	23260418	47770246	26805782	34449874	33255468	41692974
20081640	42873418	26975660	55024004	24769225	39649782	42137983	58785782
7.10462e+06	27991660	14467125	38239539	32018368	54031288	39407418	50497217
16161882	36563761	1.62968e+07	46298589	42416104	56368246	43067811	47933782
25156933	54133539	53220489	68299752	47119711	47532832	36015196	37923439
29515468	53859782	43490175	47040903	52838660	40364953	29018489	30422731
29121761	29450296	4.11529e+07	57433217	36351539	30697368	43517803	33486823
16606589	46627368	46277196	58515317	53662782	35816317	46895711	48039004
15375004	58976317	30800489	59608660	46763953	52505782	44557953	46268903
2.95687e+06	45346196	1.92594e+07	42298782	46276782	30695903	45086660	26807317
AUD values obtained from Image J gel analyzer
DynB_G3A/Q8A
untreated	untreated	treated	treated	untreated	untreated	treated	treated
pP70	Cofilin	pP70	Cofilin	P70	Cofilin	P70	Cofilin
4844610	32636196	42263296	47770246	5226832	34449874	30199589	41692974
8504983	42873418	36017711	55024004	24897761	39649782	46828761	58785782
1583225	27991660	13920953	38239539	22730731	59882480	22511468	43833974
3614347	36563761	21084832	46298589	26246690	34153368	35723933	48309853
21266983	54133539	39648246	68299752	36410589	47532832	32919610	37923439
14020811	53859782	28856518	47040903	50575832	40364953	44166489	30422731
5273912	29450296	17276347	57433217	36403125	30697368	48726560	33486823
10929619	46627368	27925761	58515317	47520489	35816317	43340004	48039004
10810225	58976317	27672347	59608660	43395368	52505782	49223660	46268903
4171104	45346196	25756589	42298782	50984075	30695903	52902075	26807317
AUD values obtained from Image J gel analyzer
DynB_G3A/Q8A
untreated	untreated	treated	treated	untreated	untreated	treated	treated
pERK	Cofilin	pERK	Cofilin	ERK	Cofilin	ERK	Cofilin
575518	63444974	34134368	44660075	23594418	22420539	47745368	23564317
620639	24512711	44752731	27258196	31039711	25534125	57333146	39413267
535933	34827167	34547439	51706317	24795489	35201731	47333832	52898368
877983	47455196	38214803	44494903	34014660	26371782	56106560	54632681
4924468	48800539	43340560	41121853	35212882	38820882	43026317	41681731
2441761	39916832	47812660	37444489	31210761	35260589	52985368	52985489
2562054	28232660	59193702	24494581	33234660	39843024	32269095	25448317
5181953	48044368	55891610	61629075	16995468	28092589	28587539	19292832
1735054	58106711	50043803	66532510	30437782	50680075	39169368	54466267
1739225	22929660	44984681	38539146	37818317	47369853	42230489	56315610
1411447	48584004	48618610	50047075	31721368	18629782	48693489	53154024
977711	33247024	54197631	36567095	39183903	12823368	53210782	18616853
AUD values obtained from Image J gel analyzer

## Sheet: DynB_L5S
Analysis data of Western blots. Samples were run in duplicates, highlighted in colour
DynB_L5S
untreated	untreated	treated	treated	untreated	untreated	treated	treated
pP38	Cofilin	pP38	Cofilin	P38	Cofilin	P38	Cofilin
2.16469e+07	25246782	3.9674e+07	35995782	28922338	14363246	26726953	22916246
19718882	44090368	35733711	53867246	35127782	28685953	36552589	30024004
1.05559e+07	44974288	2.97618e+07	50445782	37330681	33483146	38481246	46331832
25725175	47302368	35407589	55718832	38781418	21023418	32619953	23497539
1.38276e+07	53875782	2.4202e+07	48440953	28842832	13340660	31845024	21765045
24823397	46146489	31304004	55201903	35535832	28201075	42895075	48962782
9.45719e+06	36946075	7.89485e+06	38732773	43241439	34816388		49276974
9050933		10395347		47564539	36977246	56781610	47736853
15902125	57073782	22276560	66045217	51586610	36468731	47254368	35128196
1.46639e+07	41399317	2.61694e+07	40922610	49515782	37919146	43117782	33947610
18444004	52391489	36894246	57801368	35470418	40650539	44622782	49675660
	44531125	3.3743e+07	50346075	29204539	43101246	34634953	54923317
AUD values obtained from Image J gel analyzer
DynB_L5S
untreated	untreated	treated	treated	untreated	untreated	treated	treated
pP70	Cofilin	pP70	Cofilin	P70	Cofilin	P70	Cofilin
8505761	25246782	46154054	35995782	25438439	14363246	28651953	22916246
8459861	44090368	26701518	53867246	41487660	28685953	46065761	30024004
	44974288	6784154	50445782	21690610	33483146	25821125	46331832
5436912	47302368	15506983	55718832	34889711	21023418	34456246	23497539
5828933	53875782	28348640	48440953	20234125	13340660	26010439	21765045
5157104	46146489	50930882	55201903	23996125	28201075	47220660	48962782
4467761	36946075	10427560	38732773		34816388		49276974
				46688539	36977246	53604903	47736853
11826983	57073782	59390489	66045217	48252368	36468731	46358368	35128196
	41399317		40922610	40989489	37919146	43707903	33947610
14161690	52391489	29089296	57801368	29615296	40650539	24522175	49675660
	44531125		50346075	27561125	43101246	33791075	54923317
AUD values obtained from Image J gel analyzer
DynB_L5S
untreated	untreated	treated	treated	untreated	untreated	treated	treated
pERK	Cofilin	pERK	Cofilin	ERK	Cofilin	ERK	Cofilin
815953	18219338	35550974	58218903	24013196	33045004	40665368	50653246
929690	47544832	42622439	33530075	37587246	48607075	38364468	39911054
1207539	43054681	48256267	41713024	45089459	14601681	51074196	33884439
1100004	18807368	55837095	28454903	25548489	57636731	32419660	38835782
2044589	44966903	58607853	58951024	26215539	22085125	42942539	28267246
1268397	38243368	43445953	51790782	27924782	14084075	49560782	27943903
755347	47749903	32415167	51291581	39779368	26895782	42502681	25306439
724589	30219782	37738489	51652782	39405489	45389024	38923489	54388903
403598	31124966	32379095	46517681	41138782	45875539	40538610	44495539
870225	61902489	49611095	60962075	45441368	56769660	49821075	46614711
691690	51208660	56310660	38750368	34468418	37985731	53036589	40291246
696790	57438903	52970317	57091317	27102004	58217439	40795246	57343660
AUD values obtained from Image J gel analyzer
